# Supplementary material for: Emergency Department Child Abuse Evaluations During COVID-19: A Multicenter Study
Source: Oxford University Press journal article supplement (doi:10.1542/peds.2022-056284), 2022-06-16
Supplement: peds_2022056284supplementarydata.pdf [file peds_2022056284supplementarydata.pdf]

## Supplemental Information

**SUPPLEMENTAL TABLE 4** ICD10-CM Codes for Suspected and Confirmed Child Physical Abuse

| Description                               | ICD-10-CM Code |
|-------------------------------------------|----------------|
| Unspecified child maltreatment, confirmed | T7492XA        |
| Unspecified child maltreatment, suspected | T7692XA        |
| Child physical abuse, confirmed           | T7412XA        |
| Child physical abuse, suspected           | T7612XA        |
| Shaken infant syndrome                    | T744XXA        |

**SUPPLEMENTAL TABLE 5** High-Risk Injury ICD-10 CM Codes for Child Physical Abuse

| Injury Category <sup>a</sup>                               | Age at Risk, mo | ICD-10-CM Codes                                                                                                                                                                                                                                                                         |
|------------------------------------------------------------|-----------------|-----------------------------------------------------------------------------------------------------------------------------------------------------------------------------------------------------------------------------------------------------------------------------------------|
| Bruising/contusion                                         | <6              | S0003, S001, S0020, S0033, S0040, S0043, S0050, S0053, S0080, S0083, S0093, S2030, S051, S100, S200, S202, S300-303, S309, S400, S500-S502, S600-S602, S700-S701, S800-S801, S900-S903, S1080, S1083, S2010, S2030, S2040, S309, S4091-S4092, S5090-5091, S6039, S609, S709, S809, S909 |
| Oropharyngeal injury                                       | <6              | S015, S025, S0050, S0051, S0053, S0057                                                                                                                                                                                                                                                  |
| Femur/humerus fracture/dislocation <sup>b</sup>            | <12             | S422-S424, S72                                                                                                                                                                                                                                                                          |
| Radius/ulna/tibia/fibula fracture/dislocation <sup>b</sup> | <12             | S52, S821-S829                                                                                                                                                                                                                                                                          |
| Intracranial hemorrhage                                    | <12             | S061-S068                                                                                                                                                                                                                                                                               |
| Rib fracture(s) <sup>b</sup>                               | <24             | S223-S225                                                                                                                                                                                                                                                                               |
| Abdominal trauma                                           | <24             | S35-S37, S381, S383, S3981, S3991                                                                                                                                                                                                                                                       |
| Genital injury                                             | <24             | S302, S303, S312-S315, S380, S382, S30812-S30817, S30872-S30877, S3093-S3098                                                                                                                                                                                                            |
| Subconjunctival hemorrhage                                 | <24             | H113                                                                                                                                                                                                                                                                                    |

<sup>a</sup> Nonexclusive categories as codes were included in each relevant category (eg, oropharyngeal bruise included as both bruising/contusion and oropharyngeal injury).

<sup>b</sup> Fracture codes ending in A, B, C except S422-424 and S223-S225, which are only A, B.

**SUPPLEMENTAL TABLE 6** Exclusion Codes

| Category                | Description                                                                                                             | ICD-10-CM Code                            |
|-------------------------|-------------------------------------------------------------------------------------------------------------------------|-------------------------------------------|
| Repeat visit            | Any other than initial visit                                                                                            | 7th Character D, S                        |
| Auto crash              | Child whose injuries were sustained from MVA or automotive crash of some sort (included planes, boats, spaceships, etc) | V00-V99                                   |
| Birth injuries          | Injuries related to birth                                                                                               | P10-P15, P52, P545, Z38                   |
| Metabolic bone diseases | Including rickets, vitamin D deficiency, and OI                                                                         | E550, E643, M839, N250, Q780, E8330-E8339 |
| Bleeding disorders      | Inclusive of specified and unspecified coagulation disorders                                                            | D66, D67, D68, D69, P53, P60, P610, P616  |
